# Supplementary material for: Plastome Diversity and Phylogenomic Relationships in Asteraceae
Source: MDPI journal article supplement (doi:10.3390/plants10122699), 2021-12-08
Supplement: s1 [file s1]

**Table S1.** List of genes annotated in the studied plastid genomes of 37 species of Asteraceae and Calyceraceae.

| Gene family                     | Gene                                                                                                                                                                                                                                                                                                                                                                                                                                                                                                                                                       |
|---------------------------------|------------------------------------------------------------------------------------------------------------------------------------------------------------------------------------------------------------------------------------------------------------------------------------------------------------------------------------------------------------------------------------------------------------------------------------------------------------------------------------------------------------------------------------------------------------|
| Transfer RNA                    | <i>trnA</i> -UGC, <i>trnC</i> -GCA, <i>trnD</i> -GUC, <i>trnE</i> -UUC, <i>trnF</i> -GAA, <i>trnG</i> -CAU, <i>trnG</i> -GCC, <i>trnG</i> -UCC, <i>trnH</i> -GUG, <i>trnI</i> -CAU, <i>trnI</i> -GAU, <i>trnK</i> -UUU, <i>trnL</i> -CAA, <i>trnL</i> -UAA, <i>trnL</i> -UAG, <i>trnM</i> -CAU, <i>trnN</i> -GUU, <i>trnP</i> -UGG, <i>trnQ</i> -UGG, <i>trnR</i> -ACG, <i>trnR</i> -UCU, <i>trnS</i> -GCU, <i>trnS</i> -GGA, <i>trnS</i> -UGA, <i>trnT</i> -GGU, <i>trnT</i> -UGU, <i>trnV</i> -GAC, <i>trnV</i> -UAC, <i>trnW</i> -CCA, <i>trnY</i> -GUA |
| Small ribosomal units           | <i>rps2</i> , <i>rps3</i> , <i>rps4</i> , <i>rps7</i> , <i>rps8</i> , <i>rps11</i> , <i>rps12</i> , <i>rps14</i> , <i>rps15</i> , <i>rps16</i> , <i>rps18</i> , <i>rps19</i>                                                                                                                                                                                                                                                                                                                                                                               |
| Large ribosomal units           | <i>rpl2</i> , <i>rpl14</i> , <i>rpl16</i> , <i>rpl20</i> , <i>rpl22</i> , <i>rpl23</i> , <i>rpl32</i> , <i>rpl33</i> , <i>rpl36</i>                                                                                                                                                                                                                                                                                                                                                                                                                        |
| RNA polymerase sub-units        | <i>rpoA</i> , <i>rpoB</i> , <i>rpoC1</i> , <i>rpoC2</i>                                                                                                                                                                                                                                                                                                                                                                                                                                                                                                    |
| Translation initiation facto    | <i>infA</i>                                                                                                                                                                                                                                                                                                                                                                                                                                                                                                                                                |
| NADH dehydrogenase              | <i>ndhA</i> , <i>ndhB</i> , <i>ndhC</i> , <i>ndhD</i> , <i>ndhE</i> , <i>ndhF</i> , <i>ndhG</i> , <i>ndhH</i> , <i>ndhI</i> , <i>ndhJ</i> , <i>ndhK</i>                                                                                                                                                                                                                                                                                                                                                                                                    |
| Photosystem I                   | <i>psbA</i> , <i>psaA</i> , <i>psaB</i> , <i>psaC</i> , <i>psaI</i> , <i>psaJ</i> , <i>ycf3</i> , <i>ycf4</i>                                                                                                                                                                                                                                                                                                                                                                                                                                              |
| Photosystem II                  | <i>psbA</i> , <i>psbB</i> , <i>psbC</i> , <i>psbD</i> , <i>psbE</i> , <i>psbF</i> , <i>psbH</i> , <i>psbI</i> , <i>psbJ</i> , <i>psbK</i> , <i>psbL</i> , <i>psbM</i> , <i>psbT</i> , <i>psbZ</i>                                                                                                                                                                                                                                                                                                                                                          |
| Cytochrome b/f complex          | <i>petA</i> , <i>petB</i> , <i>petD</i> , <i>petG</i> , <i>petL</i> , <i>petN</i>                                                                                                                                                                                                                                                                                                                                                                                                                                                                          |
| ATP synthase                    | <i>atpA</i> , <i>atpB</i> , <i>atpE</i> , <i>atpF</i> , <i>atpH</i> , <i>atpI</i> , <i>ycf2</i>                                                                                                                                                                                                                                                                                                                                                                                                                                                            |
| Large subunit of rubisco        | <i>rbcL</i>                                                                                                                                                                                                                                                                                                                                                                                                                                                                                                                                                |
| Maturase                        | <i>matK</i>                                                                                                                                                                                                                                                                                                                                                                                                                                                                                                                                                |
| Protease                        | <i>clpP</i>                                                                                                                                                                                                                                                                                                                                                                                                                                                                                                                                                |
| Acetyl-CoA-carboxylase sub-unit | <i>accD</i>                                                                                                                                                                                                                                                                                                                                                                                                                                                                                                                                                |
| Envelope membrane protein       | <i>cemA</i>                                                                                                                                                                                                                                                                                                                                                                                                                                                                                                                                                |
| Component of TIC complex        | <i>Ycf1</i>                                                                                                                                                                                                                                                                                                                                                                                                                                                                                                                                                |
| c-Type cytochrome synthesis     | <i>ccsA</i>                                                                                                                                                                                                                                                                                                                                                                                                                                                                                                                                                |
| Uncharacterized protein         | <i>ycf15</i>                                                                                                                                                                                                                                                                                                                                                                                                                                                                                                                                               |
| Ribosomal RNA                   | <i>rrn4.5</i> , <i>rrn5</i> , <i>rrn16</i> , <i>rrn23</i>                                                                                                                                                                                                                                                                                                                                                                                                                                                                                                  |

**Table S2.** Models used for phylogenetic analyses.

| Inference Method          | Coding regions (CDS) |                    |                    | tRNA               | rRNA               |
|---------------------------|----------------------|--------------------|--------------------|--------------------|--------------------|
|                           | Codon 1              | Codon 2            | Codon 3            |                    |                    |
| <b>Maximum Likelihood</b> | GTR + $\gamma$       | GTR + $\gamma$     | GTR + $\gamma$     | GTR + $\gamma$     | GTR + $\gamma$     |
| <b>Bayesian Inference</b> | GTR + inv $\gamma$   | GTR + inv $\gamma$ | GTR + inv $\gamma$ | GTR + inv $\gamma$ | K80 + inv $\gamma$ |
