# Supplementary figures and images for: Plastome Diversity and Phylogenomic Relationships in Asteraceae
Source: MDPI journal article supplement (doi:10.3390/plants10122699), 2021-12-08

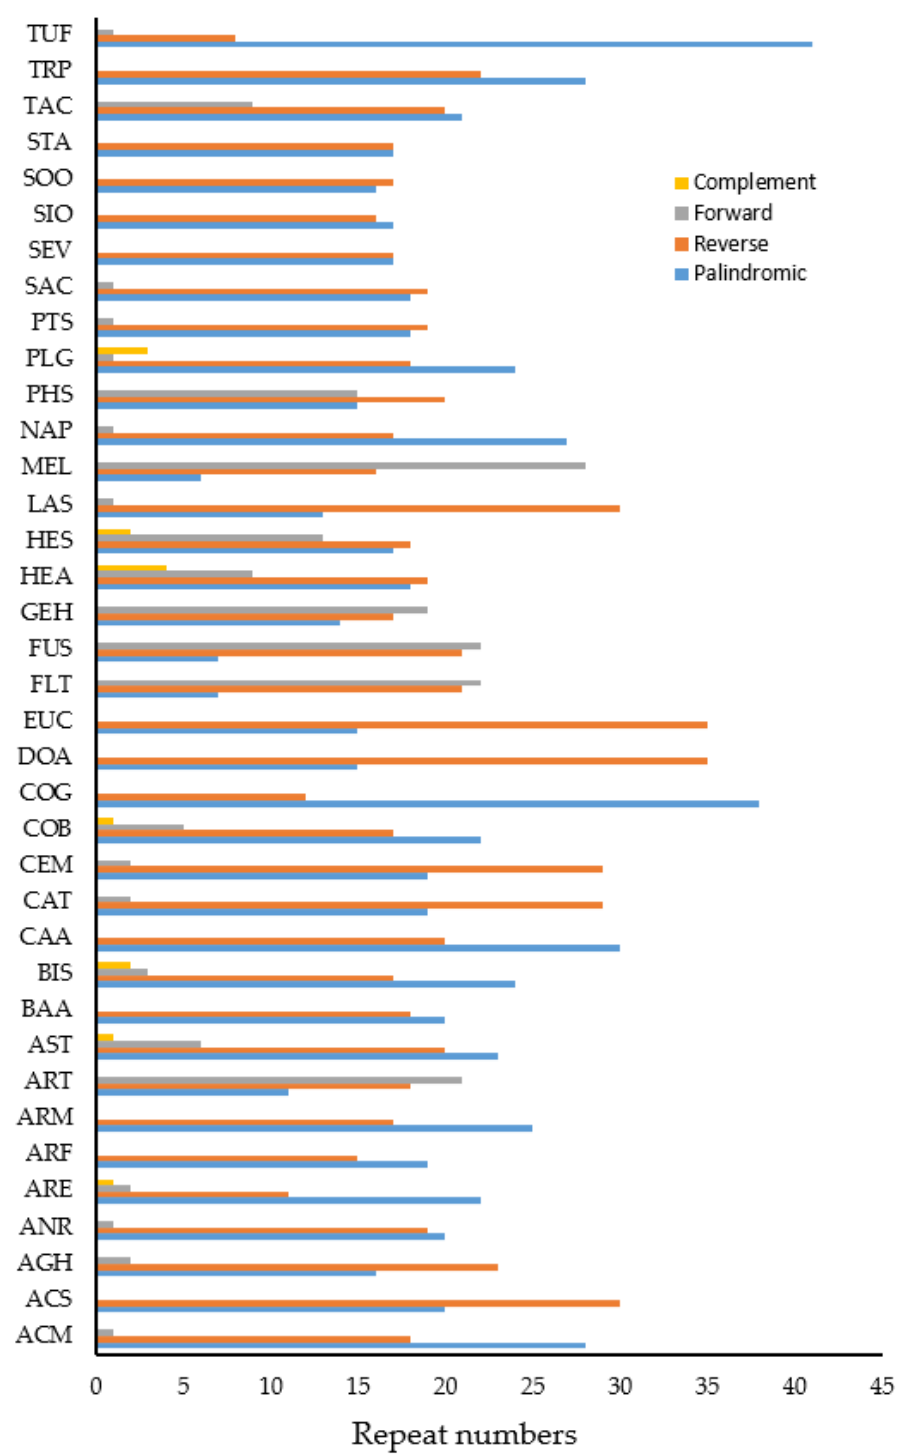

Supplement: s1 [file s1]

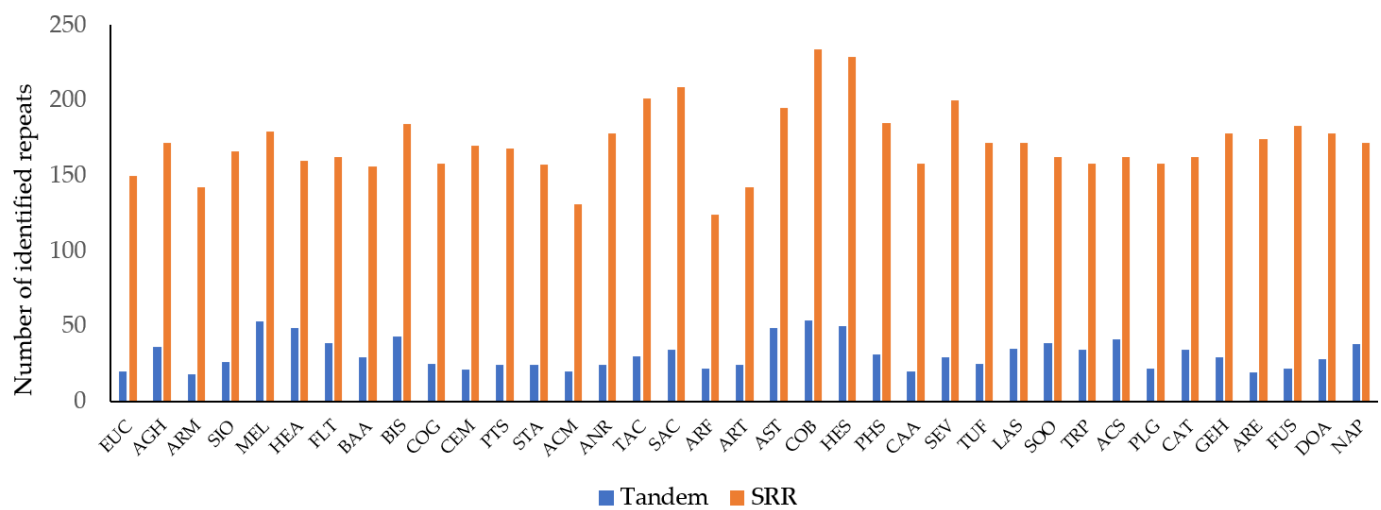

Supplement: s1 [file s1]
